# Supplementary material
Source: PubMed Central journal article supplement (PMC5815522)
Supplement: NIHMS931594-supplement-Supplement_1.pdf [file NIHMS931594-supplement-Supplement_1.pdf]

**Supplementary Data for:**

**Selective Photodepletion of Malignant T Cells in Extracorporeal  
Photophereses with Selenorhodamine Photosensitizers**

*Zachariah A. McIver, Mark W. Kryman, Young Choi, Benjamin N. Coe, Gregory A.*

*Schamerhorn, Michelle K. Linder, Kellie S. Davies, Jacqueline E. Hill, Geri A. Sawada, Jason*

*M. Grayson, and Michael R. Detty*

**Table of Contents**

**Page**

**Table S1.** Mean fluorescence intensity (MFI) from a mixture of non-stimulated PMBCs, HUT-78 cells, and selenorhodamines **5-10** following uptake and extrusion. S3

**Table S2.** Extrusion kinetics for non-stimulated PMBCs, HUT-78 cells, and thioamide/amide pairs **5/6, 7/8, and 9/10** S4

**Table S3.** Mean fluorescence intensity (MFI) from a mixture of SEB-stimulated PMBCs, HUT-78 cells, and selenorhodamines **5-10** following uptake and extrusion. S5

**Table S4.** Extrusion kinetics for SEB-stimulated PMBCs, HUT-78 cells, and thioamide/amide pairs **5/6, 7/8, and 9/10** S6

**Figure S1.** Fluorescence spectra for tetramethyl selenorosamine (**2**) and selenorhodamines **5, 6, 9, and 10**. S7

**Figure S2.** Decay traces of singlet oxygen phosphorescence at 1270 nm for tetramethyl selenorosamine (**2**) and selenorhodamines **5, 6, 9, and 10**. S8

**Figure S3.** Similarity coefficient between MTG and selenorhodamines **3**, **4**, or **5** in HUT-78 cells. S9

**Figure S4.** Flow cytometric analysis of resting, stimulated, and malignant T cells. S10

**Table S1.** Mean fluorescence intensity (MFI) in arbitrary units (a.u.). from a 5:1 mixture of non-stimulated PMBCs and selenorhodamine photosensitizers **5-10** following uptake and extrusion.

| T-cell subset | Dye      | MFI, a.u. uptake | MFI, a.u. extrusion | Dye       | MFI, a.u. uptake | MFI, a.u. extrusion |
|---------------|----------|------------------|---------------------|-----------|------------------|---------------------|
| HUT-78        | <b>5</b> | 174000 ± 9000    | 126000 ± 1100       | <b>6</b>  | 22800 ± 1200     | 10000 ± 300         |
| CD3+          | <b>5</b> | 63900 ± 19400    | 42600 ± 2200        | <b>6</b>  | 8150 ± 200       | 3690 ± 60           |
| CD4+          | <b>5</b> | 62600 ± 2100     | 39900 ± 3600        | <b>6</b>  | 7800 ± 300       | 3170 ± 120          |
| CD8+          | <b>5</b> | 42000 ± 2800     | 18000 ± 3900        | <b>6</b>  | 1980 ± 300       | 600 ± 100           |
| HUT-78        | <b>7</b> | 90000 ± 7200     | 64000 ± 4700        | <b>8</b>  | 90000 ± 3600     | 48000 ± 4000        |
| CD3+          | <b>7</b> | 34800 ± 2100     | 21800 ± 1100        | <b>8</b>  | 30000 ± 700      | 3110 ± 80           |
| CD4+          | <b>7</b> | 33900 ± 2100     | 21000 ± 1600        | <b>8</b>  | 29300 ± 1300     | 13600 ± 1400        |
| CD8+          | <b>7</b> | 22600 ± 1400     | 11200 ± 1800        | <b>8</b>  | 16100 ± 2100     | 3470 ± 670          |
| HUT-78        | <b>9</b> | 30400 ± 2400     | 19800 ± 1500        | <b>10</b> | 43900 ± 1800     | 24900 ± 700         |
| CD3+          | <b>9</b> | 13200 ± 600      | 7900 ± 400          | <b>10</b> | 16400 ± 300      | 8000 ± 50           |
| CD4+          | <b>9</b> | 12800 ± 700      | 7300 ± 500          | <b>10</b> | 15700 ± 600      | 7300 ± 400          |
| CD8+          | <b>9</b> | 8400 ± 800       | 3600 ± 500          | <b>10</b> | 7600 ± 800       | 1900 ± 300          |

<sup>a</sup> A 5:1 mixture of non-stimulated PMBCs and HUT-78 cells was treated with  $7.5 \times 10^{-8}$  selenorhodamine for 20 min (uptake). A second 5:1 mixture of non-stimulated PMBCs and HUT-78 cells was treated with  $7.5 \times 10^{-8}$  selenorhodamine for 20 min followed by 30 min in photosensitizer-free media (extrusion). Values of MFI were determined by flow cytometry following both uptake and extrusion and are the mean of three independent experiments. Error limits are ± SEM.

**Table S2.** Extrusion kinetics for thioamide/amide pairs **5/6**, **7/8**, and **9/10** as measured by the change in mean fluorescence intensity ( $\Delta$ MFI) for a mixture of non-stimulated PMBCs and HUT-78 cells.

| T-cell subset | Thioamide | $\Delta$ MFI $\pm$ SEM, % | Amide     | $\Delta$ MFI $\pm$ SEM, % | Paired t-test <i>p</i> -value |
|---------------|-----------|---------------------------|-----------|---------------------------|-------------------------------|
| HUT-78        | <b>5</b>  | 28.1 $\pm$ 5.4            | <b>6</b>  | 55.7 $\pm$ 1.9            | 0.009                         |
| CD3+          | <b>5</b>  | 33.1 $\pm$ 5.5            | <b>6</b>  | 54.6 $\pm$ 1.6            | 0.02                          |
| CD4+          | <b>5</b>  | 36.1 $\pm$ 5.2            | <b>6</b>  | 59.1 $\pm$ 2.0            | 0.015                         |
| CD8+          | <b>5</b>  | 59.2 $\pm$ 7.3            | <b>6</b>  | 69.0 $\pm$ 2.0            | 0.27                          |
| HUT-78        | <b>7</b>  | 28.2 $\pm$ 3.2            | <b>8</b>  | 47.1 $\pm$ 3.9            | 0.02                          |
| CD3+          | <b>7</b>  | 36.8 $\pm$ 2.4            | <b>8</b>  | 52.7 $\pm$ 2.9            | 0.013                         |
| CD4+          | <b>7</b>  | 37.7 $\pm$ 3.3            | <b>8</b>  | 54.1 $\pm$ 2.8            | 0.02                          |
| CD8+          | <b>7</b>  | 51.0 $\pm$ 6.3            | <b>8</b>  | 79.6 $\pm$ 1.6            | 0.012                         |
| HUT-78        | <b>9</b>  | 34.6 $\pm$ 2.4            | <b>10</b> | 43.1 $\pm$ 0.9            | 0.03                          |
| CD3+          | <b>9</b>  | 40.1 $\pm$ 1.9            | <b>10</b> | 51.3 $\pm$ 0.6            | 0.005                         |
| CD4+          | <b>9</b>  | 42.8 $\pm$ 1.2            | <b>10</b> | 53.3 $\pm$ 1.7            | 0.007                         |
| CD8+          | <b>9</b>  | 57.5 $\pm$ 1.5            | <b>10</b> | 76.2 $\pm$ 3.3            | 0.007                         |

<sup>a</sup> A 5:1 mixture of non-stimulated PMBCs and HUT-78 cells was treated with  $7.5 \times 10^{-8}$  selenorhodamines **5-10** for 20 min (uptake). A second 5:1 mixture of non-stimulated PMBCs was treated with  $7.5 \times 10^{-8}$  selenorhodamines **5-10** for 20 min and cells were then washed and placed in photosensitizer-free media for 30 min (extrusion). Values of MFI were determined by flow cytometry following both uptake and extrusion. The change in MFI following uptake and extrusion was calculated as the mean of three independent experiments. Error limits are  $\pm$  SEM. The significance of the difference in  $\Delta$ MFI for thioamide/amide pairs is reported as the paired Student t-test *p* value.

**Table S3.** Mean fluorescence intensity (MFI) in arbitrary units (a.u.). from a 5:1 mixture of SEB-stimulated PMBCs and selenorhodamine photosensitizers **3-10** following uptake and extrusion.

| T-cell subset | Dye      | MFI, a.u. uptake | MFI, a.u. extrusion | Dye       | MFI, a.u. uptake | MFI, a.u. extrusion |
|---------------|----------|------------------|---------------------|-----------|------------------|---------------------|
| HUT-78        | <b>3</b> | 39300 ± 1500     | 37600 ± 1100        | <b>4</b>  | 15300 ± 80       | 5270 ± 80           |
| CD25+         | <b>3</b> | 45800 ± 2400     | 32200 ± 500         | <b>4</b>  | 5390 ± 150       | 3110 ± 80           |
| CD25-         | <b>3</b> | 10500 ± 360      | 4800 ± 210          | <b>4</b>  | 900 ± 20         | 270 ± 10            |
| HUT-78        | <b>5</b> | 81000 ± 2700     | 66000 ± 1700        | <b>6</b>  | 6800 ± 170       | 4500 ± 210          |
| CD25+         | <b>5</b> | 83300 ± 1800     | 69000 ± 1000        | <b>6</b>  | 7510 ± 130       | 4500 ± 70           |
| CD25-         | <b>5</b> | 25500 ± 600      | 16600 ± 530         | <b>6</b>  | 1450 ± 70        | 580 ± 20            |
| HUT-78        | <b>7</b> | 42000 ± 600      | 36000 ± 1700        | <b>8</b>  | 33200 ± 900      | 20000 ± 900         |
| CD25+         | <b>7</b> | 43300 ± 600      | 33800 ± 600         | <b>8</b>  | 33800 ± 600      | 25000 ± 600         |
| CD25-         | <b>7</b> | 14100 ± 120      | 9500 ± 130          | <b>8</b>  | 9300 ± 400       | 3900 ± 240          |
| HUT-78        | <b>9</b> | 13800 ± 300      | 11700 ± 300         | <b>10</b> | 9130 ± 360       | 6240 ± 320          |
| CD25+         | <b>9</b> | 14500 ± 20       | 12100 ± 260         | <b>10</b> | 10900 ± 130      | 7300 ± 210          |
| CD25-         | <b>9</b> | 5400 ± 20        | 3700 ± 40           | <b>10</b> | 2500 ± 60        | 1100 ± 40           |

<sup>a</sup> A 5:1 mixture of SEB-stimulated PMBCs and HUT-78 cells was treated with  $7.5 \times 10^{-8}$  selenorhodamine for 20 min (uptake). A second 5:1 mixture of non-stimulated PMBCs and HUT-78 cells was treated with  $7.5 \times 10^{-8}$  selenorhodamine for 20 min followed by 30 min in photosensitizer-free media (extrusion). Values of MFI were determined by flow cytometry following both uptake and extrusion and are the mean of three independent experiments. Error limits are ± SEM.

**Table S4.** Extrusion kinetics for thioamide/amide pairs **5/6**, **7/8**, and **9/10** from HUT-78 cells and SEB-stimulated PMBCs as measured by the change in mean fluorescence intensity ( $\Delta$ MFI).<sup>a</sup>

| T-cell subset | Thioamide | $\Delta$ MFI $\pm$ SEM, % | Amide     | $\Delta$ MFI $\pm$ SEM, % | Paired t-test <i>p</i> -value |
|---------------|-----------|---------------------------|-----------|---------------------------|-------------------------------|
| HUT-78        | <b>5</b>  | 18.2 $\pm$ 3.2            | <b>6</b>  | 34.0 $\pm$ 2.2            | 0.015                         |
| CD25+         | <b>5</b>  | 16.8 $\pm$ 3.1            | <b>6</b>  | 39.9 $\pm$ 0.5            | 0.02                          |
| CD25-         | <b>5</b>  | 35.2 $\pm$ 0.9            | <b>6</b>  | 59.8 $\pm$ 0.6            | <0.0001                       |
| HUT-78        | <b>7</b>  | 21.1 $\pm$ 1.2            | <b>8</b>  | 32.9 $\pm$ 1.5            | 0.004                         |
| CD25+         | <b>7</b>  | 22.0 $\pm$ 0.6            | <b>8</b>  | 37.0 $\pm$ 2.5            | 0.004                         |
| CD25-         | <b>7</b>  | 32.9 $\pm$ 1.5            | <b>8</b>  | 58.6 $\pm$ 1.0            | 0.0001                        |
| HUT-78        | <b>9</b>  | 15.3 $\pm$ 2.0            | <b>10</b> | 31.6 $\pm$ 2.5            | 0.007                         |
| CD25+         | <b>9</b>  | 16.4 $\pm$ 1.8            | <b>10</b> | 33.5 $\pm$ 1.5            | 0.002                         |
| CD25-         | <b>9</b>  | 30.7 $\pm$ 0.7            | <b>10</b> | 58.0 $\pm$ 0.8            | <0.0001                       |

<sup>a</sup> A 5:1 mixture of SEB-stimulated PMBCs and HUT-78 cells was treated with  $7.5 \times 10^{-8}$  selenorhodamines **5-10** for 20 min (uptake). A second 5:1 mixture of SEB-stimulated PMBCs was treated with  $.5 \times 10^{-8}$  selenorhodamines **5-10** for 20 min and cells were then washed and placed in photosensitizer-free media for 30 min (extrusion). Values of MFI were determined by flow cytometry following both uptake and extrusion. The change in MFI following uptake and extrusion was calculated as the mean of three independent experiments. Error limits are  $\pm$  SEM. The significance of the difference in  $\Delta$ MFI for thioamide/amide pairs is reported as the paired Student t-test *p* value.

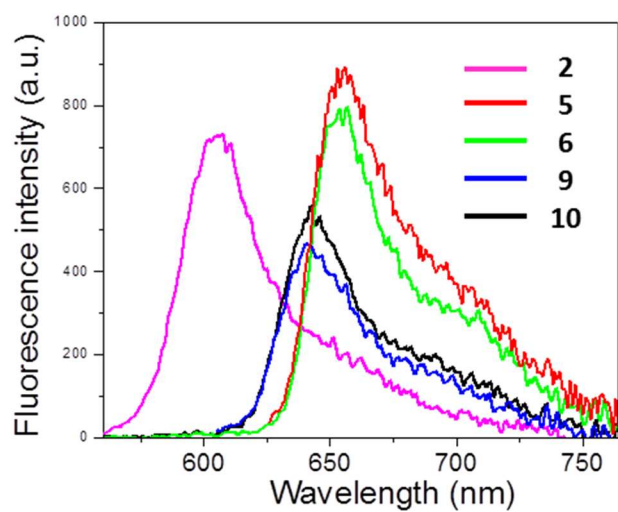

**Figure S1.** Fluorescence spectra of selenorhodamines **5**, **6**, **9**, and **10** compared to tetramethyl selenorosamine (**2**) used as a standard ( $\Phi_{\text{FL}} = 0.09$ ).

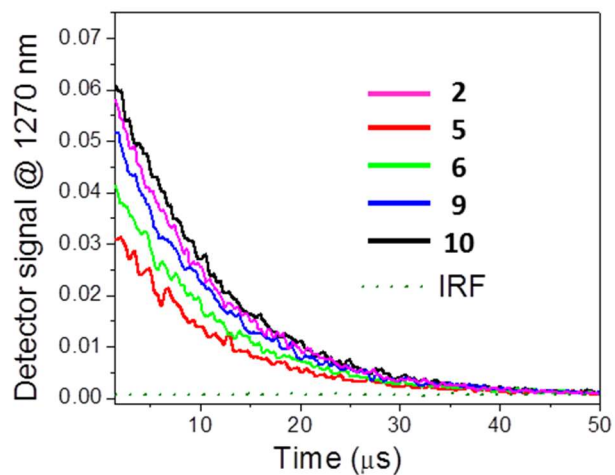

**Figure S2.** Decays of phosphorescence from  $^1\text{O}_2$  sensitized by selenorhodamines **5**, **6**, **9**, and **10** used for determination of  $\Phi(^1\text{O}_2)$ . Signal obtained from air-saturated MeOH in the cuvette was used as the instrument response function (IRF). Tetramethyl selenorosamine (**2**) was used as a standard [ $\Phi(^1\text{O}_2) = 0.87$ ].



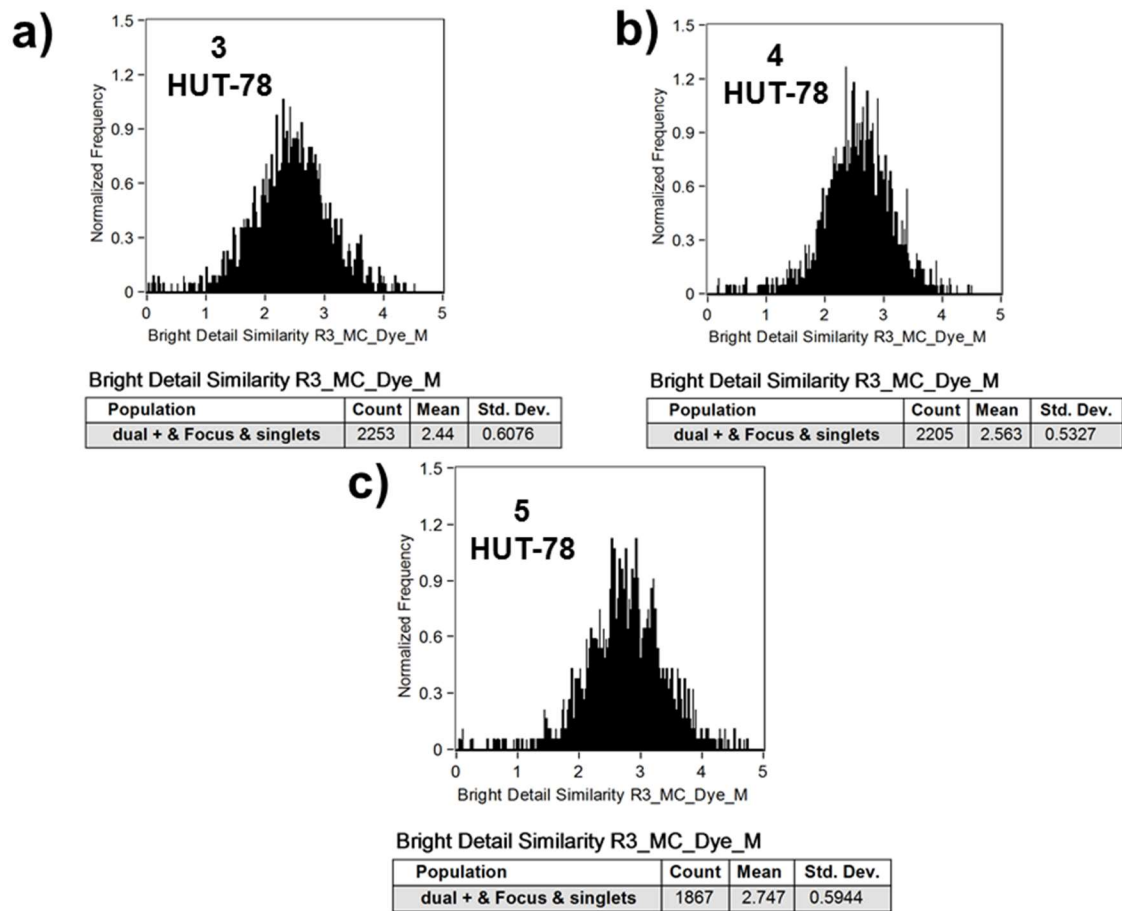

**Figure S3.** A histogram of the pixel-by-pixel statistical analysis of each HUT-78 cell analyzed, in which the y-axis is number of cells and the x-axis is the similarity coefficient between MTG and selenorhodamines **3**, **4**, or **5**.

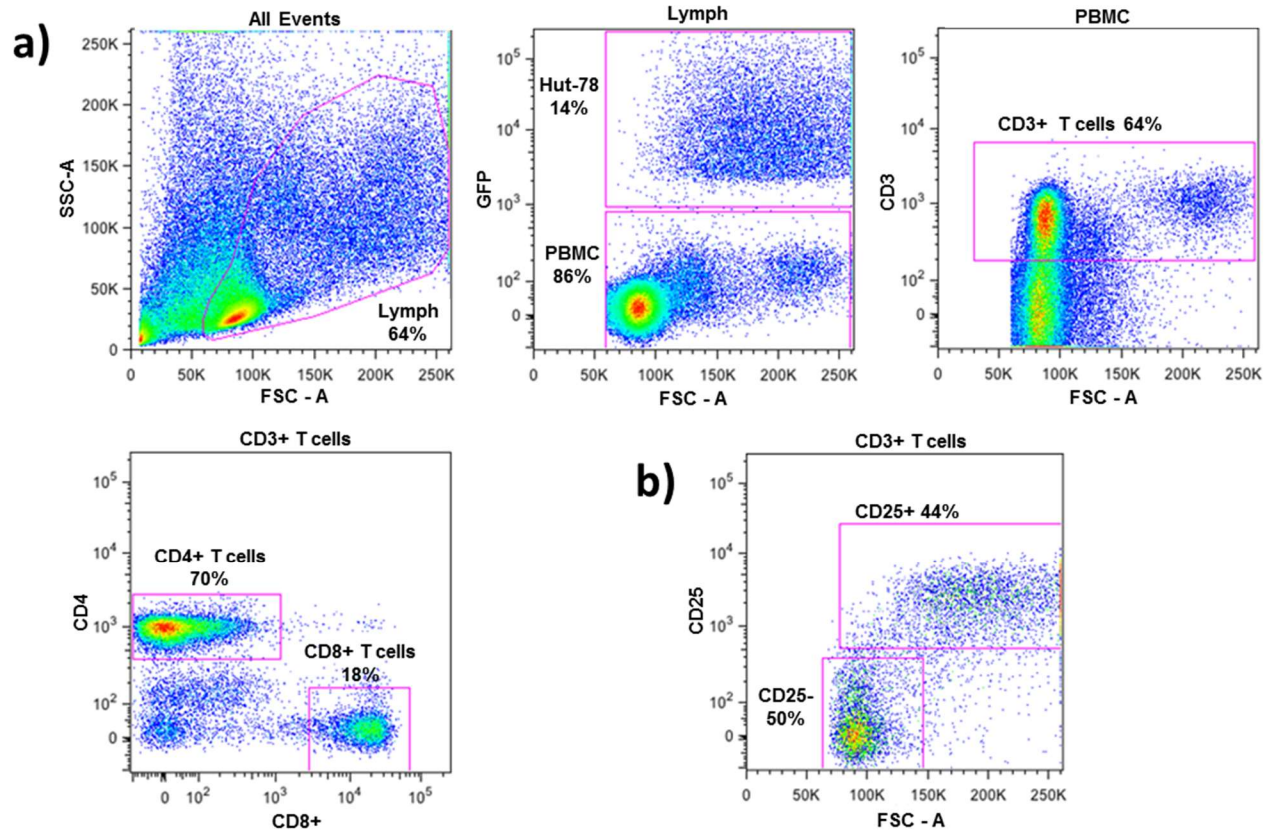

**Figure S4.** Flow cytometric analysis of resting, stimulated, and malignant T cells. Donor peripheral blood mononuclear cells (PBMC) were mixed with green fluorescent protein (GFP)-transfected HUT-78 malignant T cells prior to photodepletion. FACS analysis was then performed 18 hours after photodepletion to determine cell survival. All cells were then stained, acquired, and analyzed as outlined in the Experimental Section. A) Lymphocytes (Lymph) were identified in a side scatter-area (SSC-A) versus forward scatter-area (FSC-A) plot. Next, GFP+ HUT-78 malignant T cells and PBMC were identified in a GFP versus FSC-A plot. Within the PBMC population, T cells were identified by gating on CD3+ cells in a CD3 versus FSC-A plot. Finally, in resting PBMC containing samples, T cell subsets were identified by gating separately on the CD4+ and CD8+ populations in a CD4 versus CD8 plot. B) In SEB-stimulated PBMC containing

samples, T cell subsets were identified by gating separately on stimulated (CD25+) and resting (CD25-) populations in a CD25 versus FSC-A plot.
